# Supplementary material
Source: PubMed Central journal article supplement (PMC4370189)
Supplement: NIHMS258122-supplement-Supplemental_Information.pdf [file NIHMS258122-supplement-Supplemental_Information.pdf]

## A single N-terminal cysteine in TRPV1 determines activation by pungent compounds from onion and garlic

Héctor Salazar, Itzel Llorente, Andrés Jara-Oseguera, León D. Islas, Refugio García-Villegas, Mika Munari, Sharona E. Gordon & Tamara Rosenbaum.

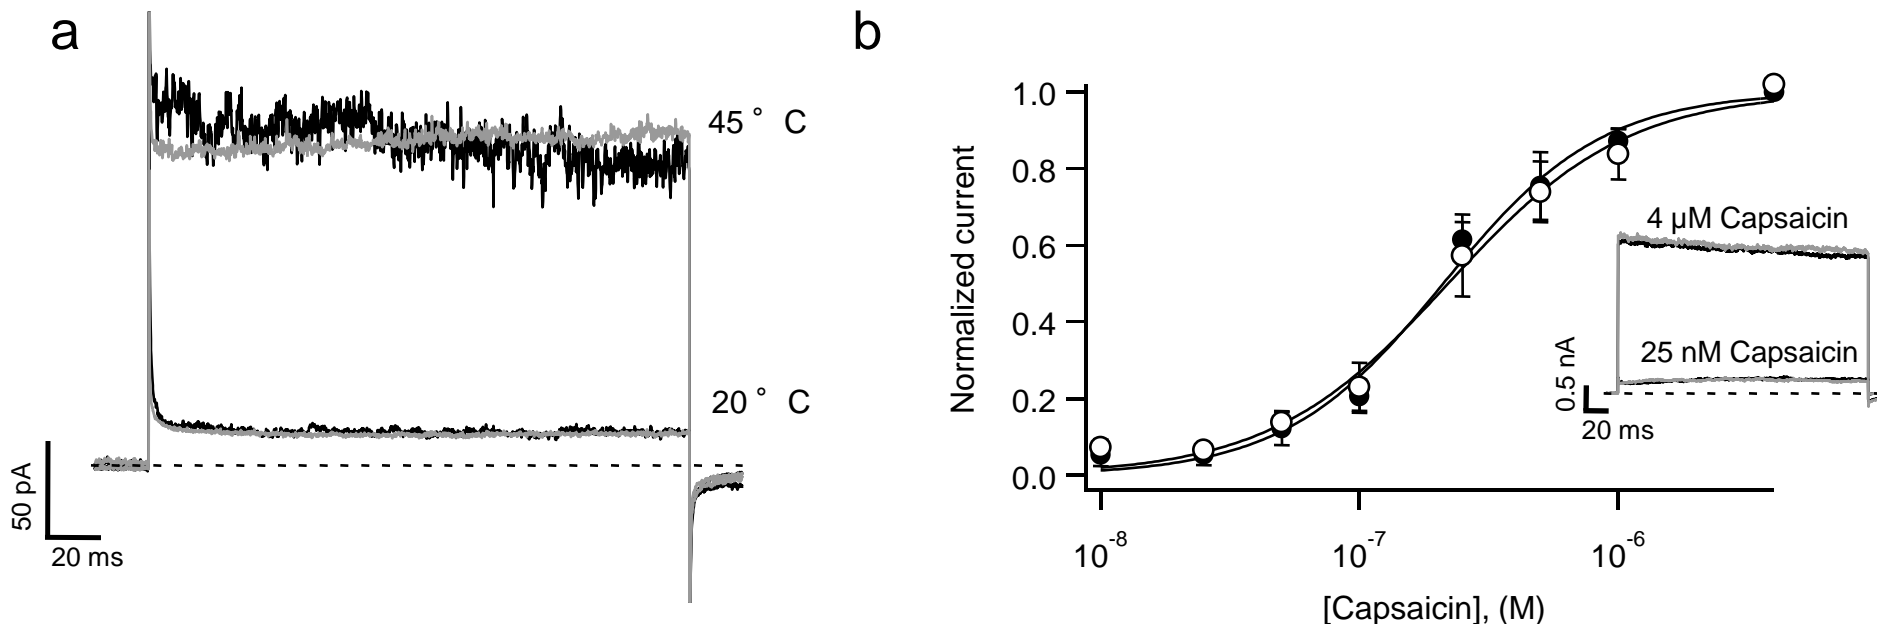

**Supplementary Figure 1. DTT does not affect activation of TRPV1 in response to temperature or capsaicin.** (a) Representative traces from 5 equal experiments obtained at +100 mV. The black traces depict current activation in TRPV1-expressing HEK293 membrane patches in response to the temperatures indicated. The grey traces represent currents after treatment with 10 mM DTT in the same patch. (b) Dose-response for activation by capsaicin before (filled symbols) and after treatment with 10 mM DTT (empty symbols). Smooth lines are fits to the Hill equation yielding  $K_D$  of  $178 \pm 7.6$  nM before and  $145 \pm 3.1$  nM after DTT. The inset depicts representative currents obtained after activation with 25 nM or 4  $\mu$ M capsaicin before and after exposure to 10 mM DTT. The response of TRPV1-expressing HEK293 membrane patches to temperature was obtained by stepping the voltage from a holding potential of 0 mV to +100 mV for 200 ms. Temperature was varied using a CL-100 bipolar temperature controller (Warner Instruments, Hamden, CT). Membrane patches were exposed to a solution at 20 °C and to 45 °C for initial current measurements. Subsequently, the patches were treated with 10 mM DTT for 10 min and currents were re-measured at the same temperatures.

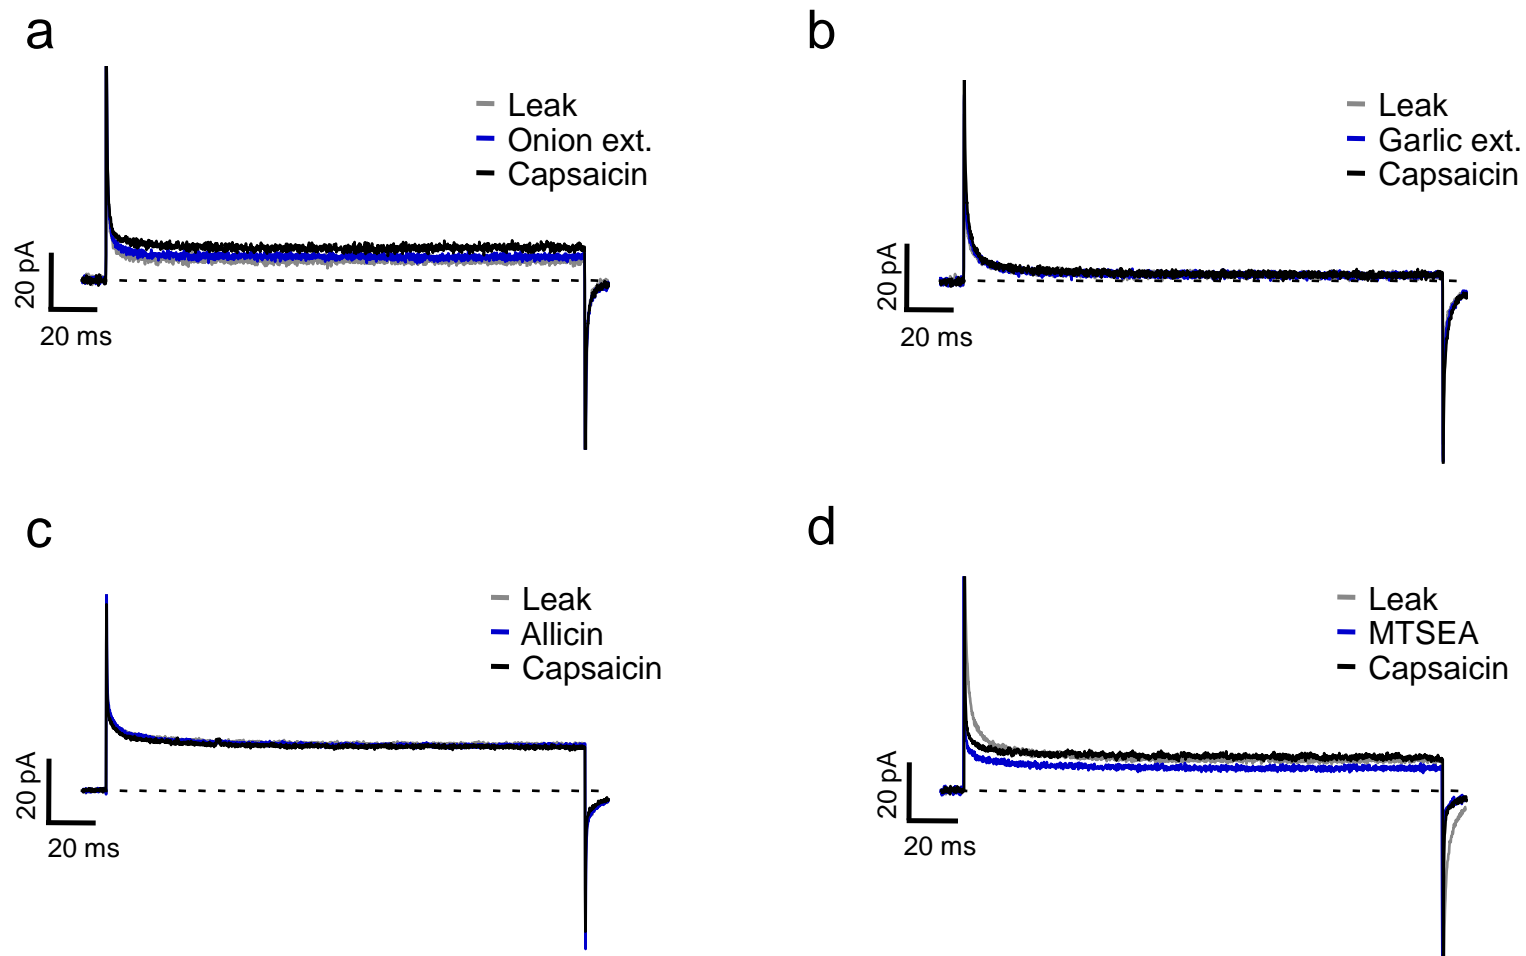

**Supplementary Figure 2. HEK 293 cells transfected only with GFP do not respond to cysteine-modifying reagents.** Voltage was stepped from a holding potential of 0 mV to 110 mV for 200 ms. After leak currents were measured, the patch was exposed to onion extract (a), to garlic extract (b), 200  $\mu$ M allicin (c) or 2 mM MTSEA for 5 minutes (d), all shown in blue. Finally, 4  $\mu$ M capsaicin was applied to all different patches. There was no current-activation under any of the described conditions. Recordings shown here are representative of 4 equal experiments.

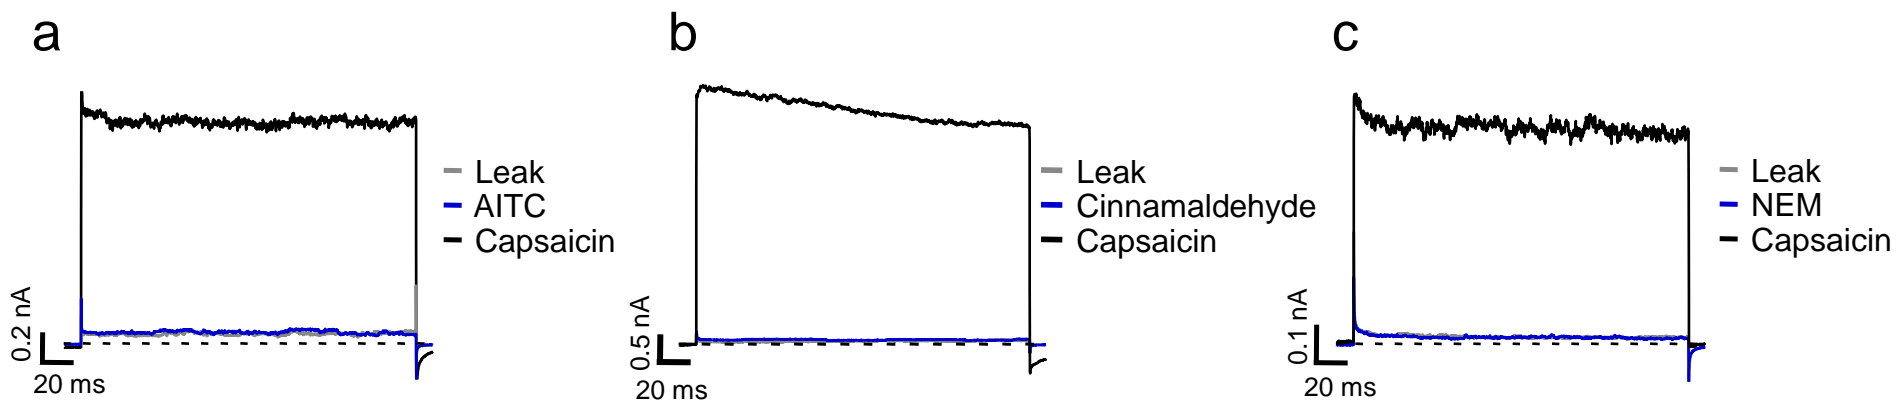

**Supplementary Figure 3. Not all cysteine-modifying reagents activate TRPV1 channels.** Representative traces shown here were obtained as in Fig. 4 from TRPV1-expressing HEK293-cell membrane patches. Addition of 200  $\mu$ M AITC (a), 100  $\mu$ M cinnamaldehyde (b) or 2 mM NEM (c) failed to activate TRPV1-mediated currents while capsaicin always activated considerable currents ( $n=5$  equal experiments).

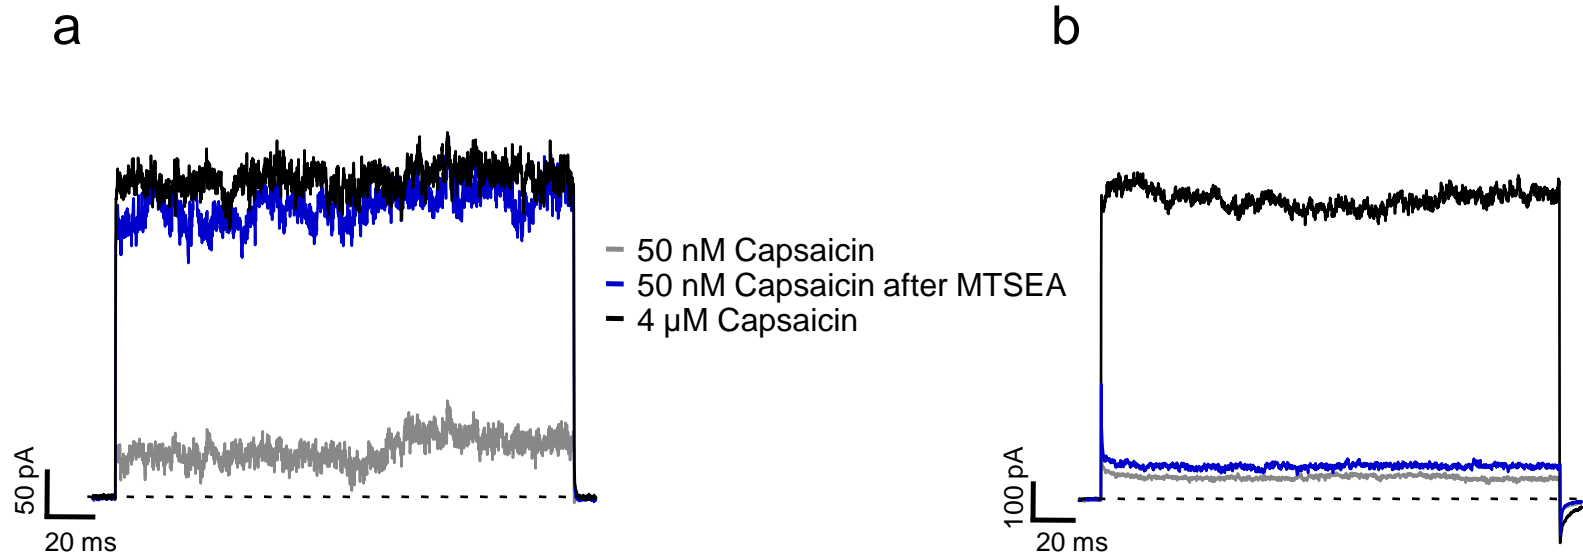

**Supplementary Figure 4. Activation of TRPV1 currents in HEK 293 cells is due to reaction of cysteine-modifying agents with an intracellular cysteine.** Pipettes were filled with recording solution and 20 mM L-cysteine in order to react with any MTSEA permeating the membrane. (a) Application of capsaicin (50 nM) to an inside-out patch activated a small current and application of MTSEA (2 mM) induced current potentiation. Exposure to 4 μM capsaicin induced activation of larger TRPV1 currents. (b) Application of MTSEA to an outside-out patch failed to produce any current increase. Application of 4 μM capsaicin induced current activation. Representative currents of 6 equal experiments.

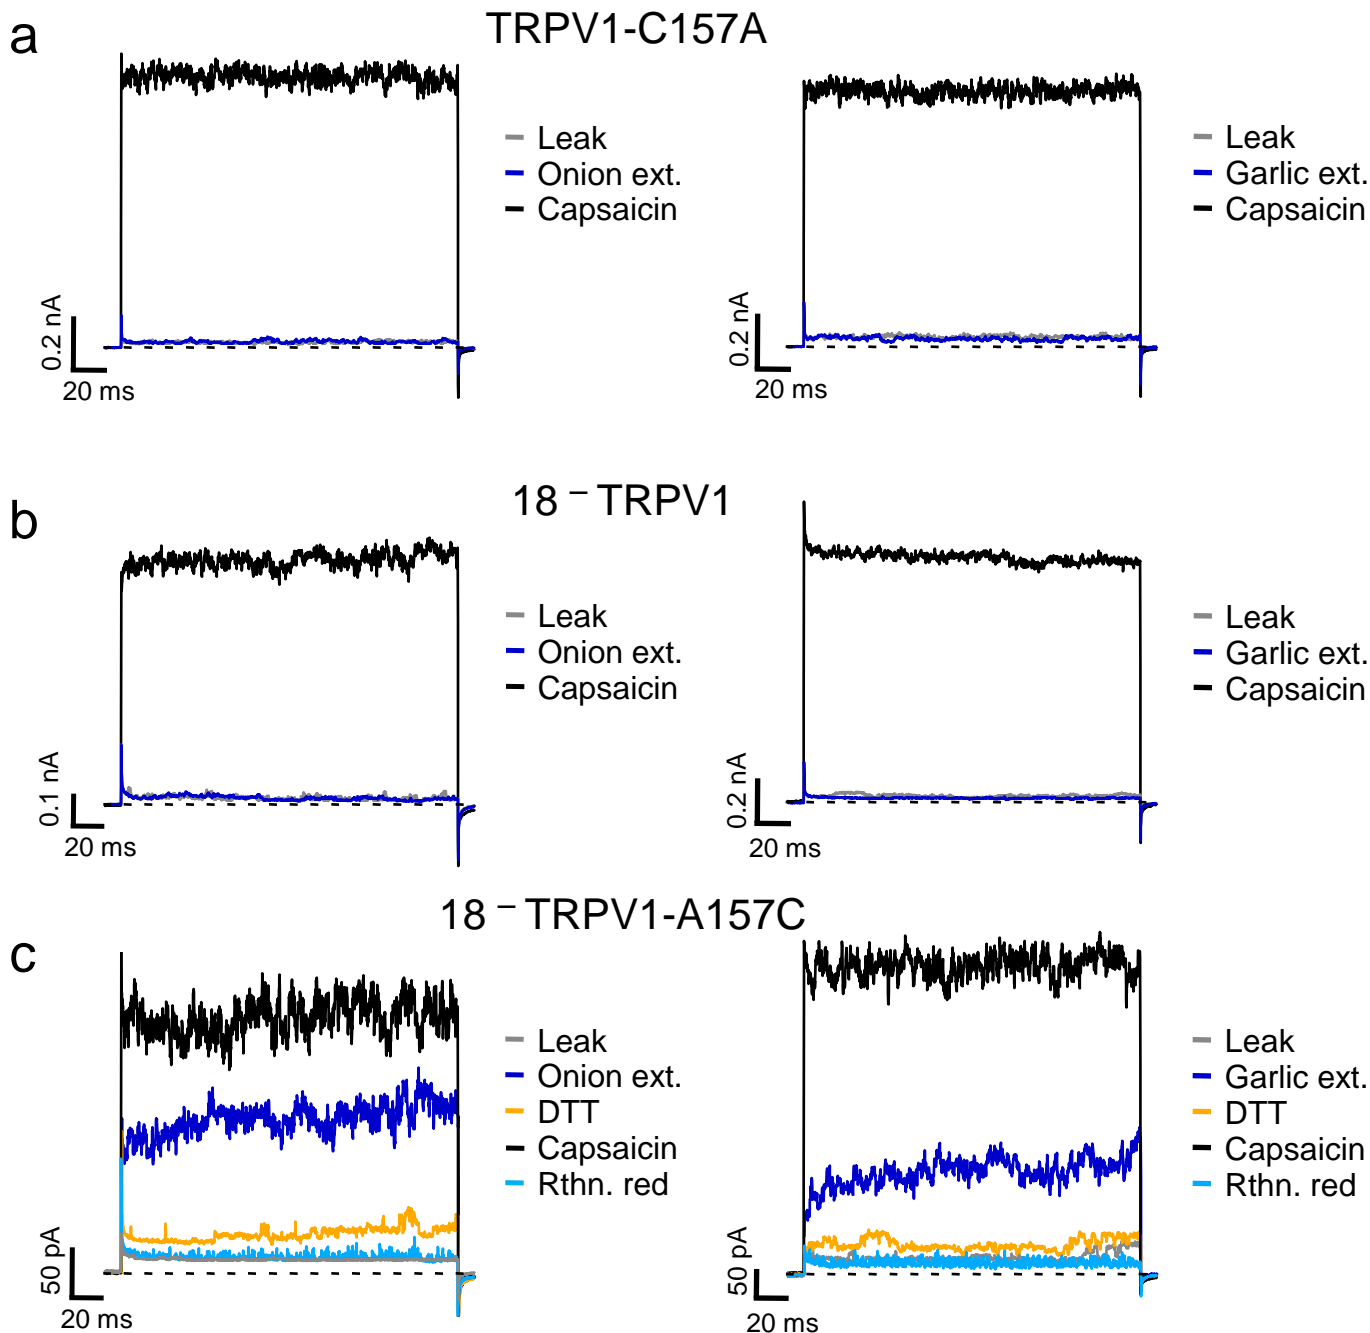

**Supplementary Figure 5. Onion and garlic extracts activate TRPV1 channels through modification of C157.** Representative traces shown were obtained as in Fig. 4 from HEK293 membrane patches. The point mutation C157A (a) and the substitution of all cysteines in the channel sequence (b) produce extract-insensitive TRPV1 channels. (c) Reinsertion of C157 into 18-TRPV1 regains channel sensitivity to the extracts. Effects of extracts on 18-TRPV1-C157 are reversible by application of DTT (10 mM).

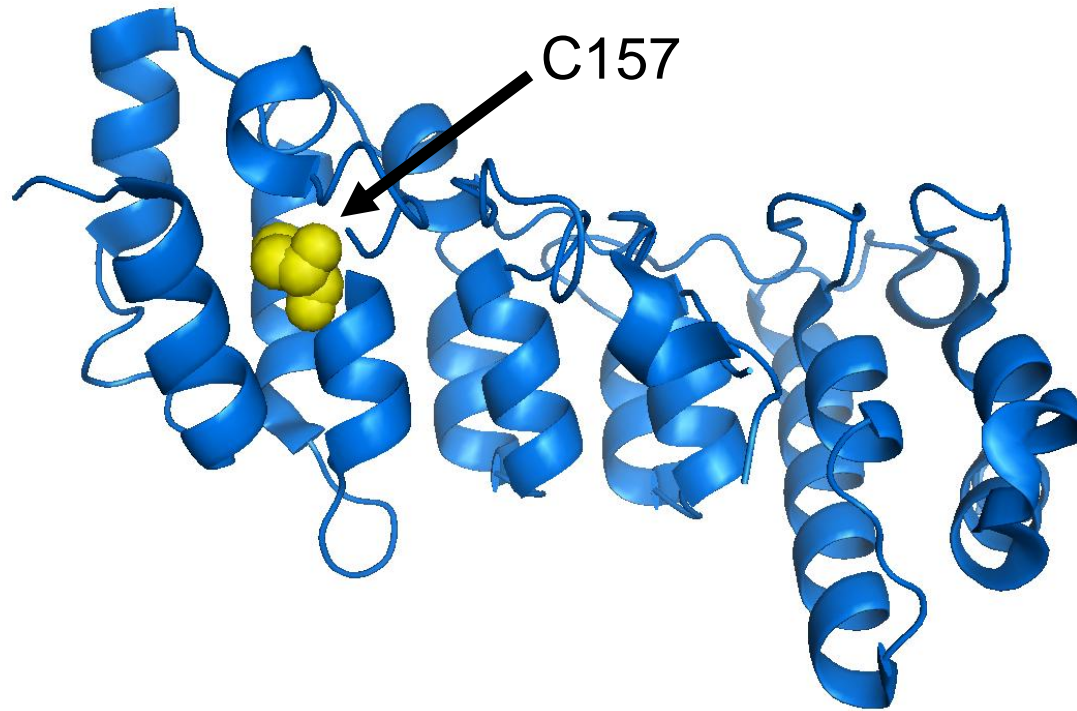

**Supplementary Figure 6. Localization of C157 in the N-terminus of TRPV1.** Ribbon diagram rendering of the published structure of the N-terminus of TRPV1. Based on this structure, C157 (shown in yellow) is found at the inner helix 2 of the ANK-2 repeat of TRPV1.
